# Supplementary material for: Unfinished business: integrating individual decision-makers' experience and incentives to organizational performance feedback theory
Source: Front Psychol. 2023 Jul 5;14:1166185. doi: 10.3389/fpsyg.2023.1166185 (PMC10354647; doi:10.3389/fpsyg.2023.1166185)
Supplement: Supplementary file 1 [file Table_1.docx]

Supplementary Material

Unfinished Business: Integrating Individual Decision-Makers’ Experience and Incentives to Organizational Performance Feedback Theory

Daniela Blettner1, Serhan Kotiloglu2*, Thomas Lecher3

1Beedie School of Business, Simon Fraser University, Burnaby, BC, Canada

2College of Business Administration, California State University San Marcos, San Marcos, CA, USA

3School of Business, Stevens Institute of Technology, Hoboken, NJ, USA

*** Correspondence:**Daniela Blettner
daniela_blettner@sfu.ca

**APPENDIX**: Studies included in the meta-analysis

| **Study** | **Sample Size** | **Data Collection Period** | **Inclusion of Individual-Level Variables** |
| --- | --- | --- | --- |
| Ahn et al., 2020 | 447 observations | 2011-2017 | No |
| Alessandri, 2006 | 2,230 observations | 1998-2003 | Yes |
| Alessandri, 2008 | 128 observations | 1998-2000 | Yes |
| Alexy et al., 2016 | 313 observations | 2008-2010 | No |
| Arora et al., 2011 | 1,522 observations | 2001-2006 | Yes |
| Arrfelt et al., 2012 | 8,266 observations | 1998-2006 | Yes |
| Askin and Bothner, 2016 | 1,019 observations | 2005-2012 | No |
| Audia and Brion, 2007 | 88 observations | 1977-1999 | No |
| Audia and Greve, 2006 | 178 observations | 1974-1995 | No |
| Audia et al., 2000 | 150 observations | 1974-1985 | Yes |
| Barreto, 2012 | 25,452 observations | 1991-1994 | No |
| Baum and Dahlin, 2007 | 189 observations | 1975-2001 | No |
| Baum et al., 2005 | 2,465 observations | 1952-1990 | Yes |
| Ben-Oz and Greve, 2015 | 252 observations | 2007 | Yes |
| Blageova et al., 2020 | 1,887 observations | 2002-2014 | Yes |
| Blettner and Di Lorenzo, 2017 | 1,209 observations | 1990-2003 | No |
| Blettner et al., 2019 | 5,549 observations | 1998-2014 | No |
| Borgholthaus et al., 2021 | 3,032 observations | 2008-2017 | Yes |
| Boyle and Shapira, 2012 | 112 observations | 1990-1999 | Yes |
| Bromiley and Washburn, 2011 | 22,189 observations | 1977-1997 | No |
| Busenbark et al., 2018 | 9,401 observations |  | No |
| Buyl and Boone, 2014 | 298 observations | 2000-2009 | Yes |
| Buyl et al., 2019 | 920 observations | 2006-2008 | Yes |
| Cabral et al., 2023 | 94,876 observations | 1990-2015 | No |
| Calabrò et al., 2018 | 432 observations | 2000-2014 | Yes |
| Castellanata et al., 2015 | 7,223 observations | 1973-2008 | No |
| Ceci et al., 2012 | 2,265 observations | 2001-2006 | No |
| Ceci et al., 2016 | 762 observations | 2001-2006 | No |
| Chen, 2008 | 15,171 observations | 1980-2001 | No |
| Chen and Li, 2021 | 711 observations | 2008-2015 | No |
| Chen et al., 2021 | 3,790 observations | 2007-2020 | Yes |
| Chen and Miller, 2007 | 35,970 observations | 1980-2001 | No |
| Chen and Song, 2020 | 6,543 observations | 2004-2011 | No |
| Chen et al., 2023 | 6,981 observations | 2008-2020 | Yes |
| Cheng et al., 2021 | 7,460 observations | 2011-2017 | Yes |
| Cheon, 2020 | 592 observations |  | No |
| Choi et al., 2019 | 9,566 observations | 1992-2005 | Yes |
| Chrisman and Patel, 2012 | 8,473 observations | 1998-2007 | Yes |
| Clough and Piezunka, 2020 | 432 observations | 1981-2013 | No |
| Dasgupta, 2022 | 24,390 observations | 2010-2019 | No |
| Deb et al., 2019 | 27,984 observations | 1994-2013 | No |
| Delmar and Wennberg, 2007 | 79,587 observations | 1995-2002 | No |
| Deng and Long, 2019 | 10,280 observations | 2011-2016 | Yes |
| Deng et al., 2022 | 7,792 observations | 1998-2012 | No |
| Deperi et al., 2022 | 31,108 observations | 1990-2018 | No |
| Desai, 2008 | 466 observations | 1978-2003 | No |
| Desai, 2013 | 6,632 observations | 1999-2004 | No |
| Desai, 2015a | 607 observations | 2003-2010 | Yes |
| Desai, 2015b | 315 observations | 2003-2010 | No |
| Dong et al., 2021 | 7,237 observations | 2001-2005 | No |
| Dong et al., 2022 | 6,539 observations | 2008-2017 | Yes |
| Duke et al., 2022 | 1,439 observations | 2010-2017 | No |
| Eggers and Kaul, 2018 | 785,490 observations | 1980-1997 | No |
| Ertug and Caner, 2015 | 2,043 observations | 1989-2005 | No |
| Gaba et al., 2012 | 1,424 observations | 1992-2003 | No |
| Gaba et al., 2022 | 5,394 observations | 1999-2016 | Yes |
| Garcia-Garcia et al., 2022 | 852 observations | 1986-2010 | Yes |
| Gao et al., 2021 | 8,273 observations | 2004-2015 | Yes |
| Gao et al., 2022 | 5,163 observations | 2007-2013 | No |
| Gentry and Shen, 2013 | 14,729 observations | 1979-2005 | No |
| Gomez-Meija et al., 2018 | 8,485 observations | 1997-2001 | Yes |
| Goyal and Goyal, 2021 | 2,691 observations | 2010-2017 | No |
| Greve, 1998 | 16,294 observations | 1984-1992 | No |
| Greve, 2003a | 1,672 observations | 1971-1996 | No |
| Greve, 2003b | 185 observations | 1964-1995 | No |
| Greve, 2007 | 258 observations | 1971-2000 | No |
| Greve, 2008 | 4,842 observations | 1911-1996 | No |
| Greve, 2010 | 2,151 observations | 1992-2004 | No |
| Grohsjean et al., 2011 | 493 observations | 1990-2003 | No |
| Grond, 2018 | 860 observations | 2003-2013 | Yes |
| Gubbi et al., 2015 | 2,729 observations | 1992-2005 | No |
| Guo and Peng, 2017 | 16,057 observations | 1988-2015 | No |
| Guo et al., 2019 | 6,814 observations | 2011-2015 | Yes |
| Han, 2023 | 166,682 observations | 2007-2019 | No |
| Harris and Bromiley, 2007 | 868 observations | 1997-2002 | Yes |
| He et al., 2022 | 2,760 observations | 2009-2017 | Yes |
| Hendron et al., 2013 | 494 observations | 1975-1986 | No |
| Hoang and Ener, 2015 | 369 observations | 1979-2000 | No |
| Hu et al., 2017 | 11,657 observations | 1972-2010 | No |
| Hu et al., 2021 | 20,374 observations | 1992-2018 | Yes |
| Hu et al., 2022 | 2,548 observations | 1997-2017 | No |
| Huang et al., 2021a | 3,285 observations | 2009-2017 | Yes |
| Huang et al., 2021b | 136 observations | 2011-2015 | Yes |
| Hui et al., 2021 | 11,190 observations | 1997-2016 | No |
| Iglesias et al., 2019 | 40,224 observations | 1998-2008 | No |
| Iyer and Miller, 2008 | 51,567 observations | 1980-2000 | No |
| Jiang, 2018 | 327,942 observations | 1976-2002 | No |
| Jirasek, 2016 | 199 observations | 2002-2014 | No |
| Jung and Bansal, 2009 | 4,206 observations | 1992-1998 | No |
| Jung et al., 2022 | 6,672 observations |  | No |
| Kacperczyk et al., 2015 | 3,225 observations | 1980-2006 | No |
| Kavadis and Castener, 2015 | 414 observations | 2000-2007 | Yes |
| Kavusan and Frankort, 2019 | 1,016 observations | 1985-2000 | No |
| Ketchen and Palmer, 1999 | 66 observations | 1986-1990 | No |
| Kim and Kim, 2020 | 362 observations | 1995-2016 | Yes |
| Kim and Rhee, 2014 | 331 observations | 1986-2006 | Yes |
| Kim and Rhee, 2017 | 4,163 observations | 1990-2014 | No |
| Kim and Tsai, 2012 | 650 observations | 2004-2006 | No |
| Kim et al., 2015 | 8,799 observations | 1988-2005 | No |
| Kolev and McNamara, 2020 | 3,265 observations | 1999-2014 | Yes |
| Kostopoulos, 2022 | 1,139,961 observations | 2016-2017 | Yes |
| Kotiloglu, 2023 | 1,050 observations | 2012-2020 | Yes |
| Kotiloglu et al., 2018 | 24,902 observations | 2007-2016 | No |
| Kotlar et al., 2013 | 4,903 observations | 2000-2006 | No |
| Kotlar et al., 2014a | 1,019 observations | 2000-2006 | No |
| Kotlar et al., 2014b | 995 observations | 2000-2006 | No |
| Kuusela et al., 2017 | 4,660 observations | 1992-2014 | No |
| Labianca et al., 2009 | 131 observations | 2004 | No |
| Lant and Hewlin, 2002 | 116 observations |  | Yes |
| Lant and Hurley, 1999 | 417 observations |  | Yes |
| Le and Lee, 2021 | 3,133 observations | 2010-2018 | Yes |
| Lee et al., 2020 | 272 observations | 1993-2008 | No |
| Lehman and Hahn, 2013 | 22,603 observations | 2000-2005 | No |
| Lewellyn and Bao, 2015 | 83 observations | 2002-2010 | No |
| Lim, 2015 | 2,004 observations | 1994-2006 | Yes |
| Lim, 2017 | 3,008 observations | 1994-2006 | Yes |
| Lim, 2018 | 2,878 observations | 1994-2006 | Yes |
| Lim and McCann, 2014 | 3,892 observations | 1992-2006 | Yes |
| Lin, 2014 | 5,904 observations | 2000-2008 | No |
| Lin et al., 2012 | 7,290 observations | 1997-2006 | No |
| Lohrke et al., 2006 | 808 observations |  | No |
| Lu and Wong, 2019 | 2,436 observations | 1998-2012 | No |
| Lu et al., 2013 | 4,682 observations | 1999-2008 | No |
| Lucas et al., 2018 | 1,750 observations | 2009 | No |
| Luger, 2023 | 581 observations | 2016-2019 | No |
| Lungeanu et al., 2016 | 392 observations | 1992-2006 | Yes |
| Lv et al., 2019 | 10,170 observations | 2007-2017 | No |
| Lv et al., 2021 | 9,449 observations | 2008-2018 | No |
| Lycosa, 2018 | 3,586 observations | 2014-2015 | No |
| Ma, 2016 | 345 observations | 2000-2012 | Yes |
| Madidan et al., 2022 | 31,676 observations | 2016-2019 | No |
| Madsen, 2013 | 915 observations | 1990-2007 | No |
| Makarevich, 2018 | 9,837 observations | 1970-2003 | No |
| Malen and Vaaler, 2017 | 42,087 observations | 1991-2005 | No |
| Mammen, 2021 | 11,170 observations |  | No |
| Manzaneque et al., 2018 | 3,116 observations | 2001-2013 | No |
| Massini et al., 2015 | 122 observations | 1992-1996 | No |
| Mazzelli et al., 2019 | 9,954 observations | 1998-2012 | No |
| Mezias et al., 2002 | 860 observations | 1995-1997 | Yes |
| Miller, 1994 | 497 observations | 1990-1991 | No |
| Mishina et al., 2010 | 1,749 observations | 1990-1999 | No |
| Moliterno et al., 2007 | 374 observations | 1969-1983 | No |
| Moliterno et al., 2015 | 6,534 observations | 1992-2004 | No |
| Mount and Baer, 2021 | 14,187 observations | 2000-2015 | Yes |
| Murphy et al., 2001 | 810 observations | 1995-1998 | Yes |
| Nagel, 2021 | 985 observations | 2005-2016 | No |
| Nevmerzhytskyi, 2021 | 1,246 observations | 2006-2016 | No |
| O'Brien and David, 2014 | 18,283 observations | 1992-2004 | No |
| Oehler et al., 2019 | 184 observations |  | No |
| Ok and Ahn, 2019 | 325 observations | 2010-2013 | No |
| Park, 2007 | 236,237 observations | 1985-2000 | No |
| Parker et al., 2017 | 1,332 observations | 2006-2009 | No |
| Ploeg et al., 2022 | 51,567 observations | 2010-2017 | No |
| Ref and Shapira, 2016 | 3,926 observations | 1999-2007 | No |
| Rhee et al., 2019 | 1,274 observations | 2001-2008 | No |
| Roman et al., 2022 | 447 observations | 1992-2019 | Yes |
| Rostami, 2008 | 948 observations | 1991-2002 | No |
| Rowley et al., 2017 | 2,736 observations | 2001-2010 | No |
| Ruckman and Blettner, 2020 | 143 observations | 2002-2011 | No |
| Rudy and Johnson, 2016 | 2,190 observations | 1980-2006 | No |
| Ruth et al., 2013 | 29,497 observations | 1980-2000 | No |
| Salge, 2010 | 770 observations | 2002-2007 | No |
| Salge et al., 2015 | 612 observations | 2002-2007 | No |
| Saraf et al., 2018 | 7,330 observations | 1999-2006 | No |
| Saraf et al., 2021 | 7,535 observations | 1999-2006 | No |
| Say and Vasudeva, 2020 | 46,182 observations | 2005-2016 | Yes |
| Schimmer and Brauer, 2012 | 10,719 observations | 1999-2008 | No |
| Schumacher et al., 2020 | 5,482 observations | 1992-2014 | Yes |
| Schwab, 2007 | 70 observations | 1923-1940 | No |
| Sengul and Obloj, 2017 | 1,206 observations | 1998-2004 | No |
| Shi et al., 2020 | 17,727 observations | 2002-2013 | Yes |
| Shijaku et al., 2020 | 7,760 observations | 2002-2013 | No |
| Shimizu, 2007 | 1,544 observations | 1988-1998 | Yes |
| Shipilov et al., 2011 | 21,706 observations | 1979-2001 | No |
| Shou et al., 2020 | 746 observations |  | No |
| Singh and Guha, 2018 | 160 observations | 2007-2010 | No |
| Smulovitz et al., 2020 | 73,401 observations | 2005-2013 | No |
| Sobrepere i Profito et al., 2022 | 23,895 observations | 2009-2016 | Yes |
| Souder and Bromiley, 2012 | 8,241 observations | 1991-2007 | No |
| Su and Si, 2015 | 609 observations | 1995-2010 | No |
| Su and Su, 2017 | 6,539 observations |  | No |
| Sun and Qui, 2022 | 621 observations | 2013-2017 | Yes |
| Tarakci et al., 2016 | 21 observations |  | Yes |
| Titus et al., 2019 | 2,054 observations | 1996-2007 | Yes |
| Tuggle et al., 2010 | 979 observations | 1994-2000 | Yes |
| Tyler and Caner, 2015 | 622 observations | 1997-2007 | No |
| Vidal and Mitchell, 2015 | 504 observations | 1999-2009 | No |
| Villagrasa et al., 2018 | 137 observations | 2006-2008 | Yes |
| Wan et al., 2022 | 9,138 observations | 2011-2019 | Yes |
| Wang and Zhang, 2021 | 487 observations | 2012-2016 | Yes |
| Wang et al., 2021 | 12,327 observations | 2001-2017 | No |
| Wangrow et al., 2019 | 99 observations |  | Yes |
| Wennberg and Holmquist, 2008 | 2,355 observations | 1992-1995 | Yes |
| Wennberg et al., 2016 | 39,890 observations | 1995-2002 | No |
| Xie et al., 2019 | 3,575 observations | 2007-2013 | No |
| Xu and Zeng, 2020 | 1,416 observations | 2008-2013 | No |
| Xu et al., 2019 | 9,633 observations | 2007-2013 | Yes |
| Xue et al., 2022 | 19,876 observations | 2010-2018 | Yes |
| Yang et al., 2017 | 112 observations | 2000-2005 | No |
| Ye et al., 2020 | 56,716 observations | 1974-2018 | No |
| Yu et al., 2018 | 10,618 observations | 1980-2014 | No |
| Zhang, 2018 | 57,302 observations | 2000-2015 | No |
| Zhang and Greve, 2018 | 28,847 observations | 2000-2012 | No |
| Zhong et al., 2021 | 4,386 observations | 2010-2018 | Yes |
| Zhong et al., 2022 | 5,421 observations | 2005-2018 | Yes |

**REFERENCES**

Ahn, S., Cho, C.K., and Cho, T.S. (2020). Performance feedback and organizational learning: the role of regulatory focus. *Management Decision* 59(3)**,** 616-637. doi: 10.1108/md-09-2019-1319.

Alessandri, T.M. (2008). Risk and procedural rationality: a behavioral theory perspective. *Journal of Strategy and Management* 1(2)**,** 198-217. doi: 10.1108/17554250810926375.

Alessandri, T.M., and Khan, R.H. (2006). Market performance and deviance from industry norms: (Mis)alignment of organizational risk and industry risk. *Journal of Business Research* 59(10-11)**,** 1105-1115. doi: 10.1016/j.jbusres.2006.07.004.

Alexy, O., Bascavusoglu-Moreau, E., and Salter, A. (2016). Toward an aspiration-level theory of open innovation. *Industrial and Corporate Change* 25(2)**,** 289-306.

Arora, P., and Dharwadkar, R. (2011). Corporate governance and corporate social responsibility (CSR): The moderating roles of attainment discrepancy and organization slack. *Corporate Governance: An International Review* 19(2)**,** 136-152. doi: 10.1111/j.1467-8683.2010.00843.x.

Arrfelt, M., Wiseman, R.M., and Hult, G.T.M. (2012). Looking backward instead of forward: Aspiration-driven influences on the efficiency of the capital allocation process. *Academy of Management Journal* 56(4)**,** 1081-1103. doi: 10.5465/amj.2010.0879.

Askin, N., and Bothner, M.S. (2016). Status-Aspirational pricing: The "Chivas Regal" strategy in U.S. higher education, 2006-2012. *Administrative Science Quarterly* 61(2)**,** 217-253. doi: 10.1177/0001839216629671.

Audia, P.G., and Brion, S. (2007). Reluctant to change: Self-enhancing responses to diverging performance measures. *Organizational Behavior and Human Decision Processes* 102(2)**,** 255-269. doi: 10.1016/j.obhdp.2006.01.007.

Audia, P.G., and Greve, H.R. (2006). Less likely to fail: Low performance, firm size, and factory expansion in the shipbuilding industry. *Management Science* 52(1)**,** 83-94. doi: 10.1287/mnsc.1050.0446.

Audia, P.G., Locke, E.A., and Smith, K.G. (2000). The paradox of success: An archival and a laboratory study of strategic persistence following radical environmental change. *Academy of Management Journal* 43(5)**,** 837-853.

Barreto, I. (2012). A behavioral theory of market expansion based on the opportunity prospects rule. *Organization Science* 23(4)**,** 1008-1023. doi: 10.1287/orsc.1110.0674.

Baum, J.A., and Dahlin, K.B. (2007). Aspiration performance and railroads’ patterns of learning from train wrecks and crashes. *Organization Science* 18(3)**,** 368-385. doi: 10.1287/orsc.1060.0239.

Baum, J.A., Rowley, T.J., Shipilov, A.V., and Chuang, Y.-T. (2005). Dancing with strangers: Aspiration performance and the search for underwriting syndicate partners. *Administrative Science Quarterly* 50(4)**,** 536-575.

Ben-Oz, C., and Greve, H.R. (2015). Short- and long-term performance feedback and absorptive capacity. *Journal of Management* 41(7)**,** 1827-1853. doi: 10.1177/0149206312466148.

Blagoeva, R.R., Mom, T.J., Jansen, J.J., and George, G. (2020). Problem-solving or self-enhancement? A power perspective on how CEOs affect R&D search in the face of inconsistent feedback. *Academy of Management Journal* 63(2)**,** 332-355.

Blettner, D., Atanasova, C., Lucas, G.J.M., and Gedajlovic, E.R. (2019). How does financial performance feedback and personal reputation affect timing of future projects? *Academy of Management Proceedings* 2019(1)**,** 12249.

Blettner, D., and Di Lorenzo, F. (2017). "Multiple performances, aspiration levels and partnering behavior: The case of the pharmaceutical industry". (Available at SSRN).

Borgholthaus, C.J., Iyer, D.N., and O'Brien, J.P. (2021). The effects of firm aspirational performance on changes in leadership structure. *Journal of Business Research* 129**,** 319-327. doi: 10.1016/j.jbusres.2021.03.009.

Boyle, E., and Shapira, Z. (2012). The liability of leading: Battling aspiration and survival goals in the Jeopardy! Tournament of Champions. *Organization Science* 23(4)**,** 1100-1113. doi: 10.1287/orsc.1110.0690.

Bromiley, P., and Washburn, M. (2011). Cost reduction vs innovative search in R&D. *Journal of Strategy and Management* 4(3)**,** 196-214. doi: 10.1108/17554251111152243.

Busenbark, J.R., Arrfelt, M., Semadeni, M., and Withers, M.C. (2018). The role of firm performance aspirations in managers' internal capital allocation strategies. . *Academy of Management Proceedings* 2018(1)**,** 10510.

Buyl, T., and Boone, C. (2014). "Exploration versus exploitation: The differential impact of historical and social comparison performance feedback on executives' cognitive orientation," in *Behavioral Strategy: Emerging Perspectives*. Information Age Publishing - IAP), 27-54.

Cabral, J.J., Iyer, D.N., and O’Brien, J.P. (2022). EXPRESS: How the Ghosts of Past Experience Haunt Problemistic Search. *Strategic Organization* in press.

Calabrò, A., Minichilli, A., Amore, M.D., and Brogi, M. (2018). The courage to choose! Primogeniture and leadership succession in family firms. *Strategic Management Journal* 39(7)**,** 2014-2035. doi: 10.1002/smj.2760.

Castellaneta, F., Gottschalg, O., Kacperczyk, A., and Wright, M. (2015). The disadvantage of incomplete performance feedback: Evidence from private equity–backed buyouts. *Working Paper*. doi: 10.13140/RG.2.1.4903.4962.

Ceci, F., Masciarelli, F., and Prencipe, A. (Year). "Mind the gap: Adapting and reorienting organizational architectures", in: *DRUID*).

Ceci, F., Masciarelli, F., and Prencipe, A. (2016). Changes in organizational architecture: Aspiration levels, performance gaps and organizational change. *International Journal of Innovation and Technology Management* 13(01). doi: 10.1142/s0219877016500024.

Chen, W., Zhong, X., and Lan, H. (2023). Innovation for survival: The scope of negative attainment discrepancy and enterprise R&D investment. *Industrial Marketing Management* 108**,** 190-204. doi: 10.1016/j.indmarman.2022.12.002.

Chen, W.-R. (2008). Determinants of firms' backward- and forward-looking R&D search behavior. *Organization Science* 19(4)**,** 609-622. doi: 10.1287/orsc.1070.0320.

Chen, W.-R., and Miller, K.D. (2007). Situational and institutional determinants of firms' R&D search intensity. *Strategic Management Journal* 28(4)**,** 369-381. doi: 10.1002/smj.594.

Chen, X., and Li, Q. (2021). Environmental regulation, subsidy and underperforming firms' R&D expenditure: evidence from Chinese listed companies. *International Journal of Technology Management* 85(2-4).

Chen, Y., and Song, M. (2020). The persistence and dynamics of new venture growth. *Small Business Economics*. doi: 10.1007/s11187-020-00411-2.

Cheng, L., Nan, M., Fang, A.J., and Xie, E. (2021). "Performance feedback and firms’ relative strategic emphasis", in: *2021 Academy of Management Annual Meeting.* (Virtual).

Cheon, O. (2020). How do performance gaps shape managerial strategy? The role of sector-differences in U.S. nursing homes. *International Public Management Journal***,** 1-19. doi: 10.1080/10967494.2020.1815917.

Choi, J., Rhee, M., and Kim, Y.-C. (2019). Performance feedback and problemistic search: The moderating effects of managerial and board outsiderness. *Journal of Business Research* 102**,** 21-33. doi: 10.1016/j.jbusres.2019.04.039.

Chrisman, J.J., and Patel, P.C. (2012). Variations in R&D investments of family and nonfamily firms: Behavioral agency and myopic loss aversion perspectives. *Academy of Management Journal* 55(4)**,** 976-997. doi: 10.5465/ami.2011.0211.

Clough, D.R., and Piezunka, H. (2020). Tie Dissolution in Market Networks: A Theory of Vicarious Performance Feedback. *Administrative Science Quarterly* 65(4)**,** 972-1017. doi: 10.1177/0001839219899606.

DasGupta, R. (2022). Financial performance shortfall, ESG controversies, and ESG performance: Evidence from firms around the world. *Finance Research Letters* 46. doi: 10.1016/j.frl.2021.102487.

Deb, P., David, P., O'Brien, J.P., and Duru, A. (2019). Attainment discrepancy and investment: Effects on firm performance. *Journal of Business Research* 99**,** 186-196. doi: 10.1016/j.jbusres.2019.02.047.

Delmar, F., and Wennberg, K. (2007). Risk taking, aspiration levels and the evolution of new ventures. *Frontiers of Entrepreneurship Research* 27(13).

Deng, X., and Long, X. (2019). Financial Performance Gaps and Corporate Social Responsibility. *Sustainability* 11(12). doi: 10.3390/su11123438.

Deng, Z., Li, T., and Liesch, P.W. (2022). Performance shortfalls and outward foreign direct investment by MNE subsidiaries: Evidence from China. *International Business Review* 31(3). doi: 10.1016/j.ibusrev.2021.101952.

Deperi, J., Bertrand, O., Meschi, P.-X., and Nesta, L. (2022). An organizational learning approach to digital and non-digital firm acquisition behavior. *European Management Journal* 40(6)**,** 873-882. doi: 10.1016/j.emj.2022.09.005.

Desai, V.M. (2008). Constrained growth: How experience, legitimacy, and age influence risk taking in organizations. *Organization Science* 19(4)**,** 594-608. doi: 10.1287/orsc.1070.0335.

Desai, V.M. (2013). Learning to behave badly: performance feedback and illegal organizational action. *Industrial and Corporate Change* 23(5)**,** 1327-1355. doi: 10.1093/icc/dtt043.

Desai, V.M. (2015a). The behavioral theory of the (governed) firm: Corporate board bnfluences on organizations' responses to performance shortfalls. *Academy of Management Journal*.

Desai, V.M. (2015b). Learning through the distribution of failures within an organization: Evidence from heart bypass surgery performance. *Academy of Management Journal* 58(4)**,** 1032-1050. doi: 10.5465/amj.2013.0949.

Dong, J.Q., Karhade, P.P., Rai, A., and Xu, S.X. (2021). How Firms Make Information Technology Investment Decisions: Toward a Behavioral Agency Theory. *Journal of Management Information Systems* 38(1)**,** 29-58. doi: 10.1080/07421222.2021.1870382.

Dong, M., Wang, L., Yang, D., and Zhou, K.Z. (2022). Performance feedback and export intensity of Chinese private firms: Moderating roles of institution-related factors. *International Business Review* 31(3). doi: 10.1016/j.ibusrev.2021.101948.

Duke, J., Havakhor, T., Mui, R., and Parker, O. (2021). How Starting Strategy and Network Structure Shape Problemistic Search: An Examination of Venture Capital Firms. *Entrepreneurship Theory and Practice* 46(5)**,** 1344-1373. doi: 10.1177/10422587211033574.

Eggers, J.P., and Kaul, A. (2018). Motivation and ability? A behavioral perspective on the pursuit of radical invention in multi-technology incumbents. *Academy of Management Journal* 61(1)**,** 67-93. doi: 10.5465/amj.2015.1123.

Ertug, G., and Castellucci, F. (2015). Who shall get more? How intangible assets and aspiration levels affect the valuation of resource providers. *Strategic Organization* 13(1)**,** 6-31. doi: 10.1177/1476127014561019.

Gaba, V., and Bhattacharya, S. (2012). Aspirations, innovation, and corporate venture capital: A behavioral perspective. *Strategic Entrepreneurship Journal* 6(2)**,** 178-199. doi: 10.1002/sej.1133.

Gaba, V., Lee, S., Meyer-Doyle, P., and Zhao-Ding, A. (2022). Prior Experience of Managers and Maladaptive Responses to Performance Feedback: Evidence from Mutual Funds. *Organization Science*. doi: 10.1287/orsc.2022.1605.

Gao, R., Lu, J.W., Hu, H.W., and Martin, G. (2023). A tale of two distractions: How institutional forces influence

R&D

‐based problemistic search in transition economies? *Journal of Product Innovation Management*. doi: 10.1111/jpim.12657.

Gao, Y., Yang, H., and Zhang, M. (2021). Too bad to fear, too good to dare? Performance feedback and corporate misconduct. *Journal of Business Research* 131**,** 1-11. doi: 10.1016/j.jbusres.2021.03.041.

García-García, R., García-Canal, E., and Guillén, M.F. (2022). Walking on thin ice: CEOs′ internationalization decisions in underperforming firms. *Long Range Planning* 55(5). doi: 10.1016/j.lrp.2022.102243.

Gentry, R.J., and Shen, W. (2013). The impacts of performance relative to analyst forecasts and analyst coverage on firm R&D intensity. *Strategic Management Journal* 34(1)**,** 121-130. doi: 10.1002/smj.1997.

Gomez-Mejia, L.R., Patel, P.C., and Zellweger, T.M. (2018). In the horns of the dilemma: Socioemotional wealth, financial wealth, and acquisitions in family firms. *Journal of Management* 44(4)**,** 1369-1397. doi: 10.1177/0149206315614375.

Goyal, L., and Goyal, V. (2021). Performance shortfall, feedback interpretation and R&D search: The differential effects of peers’ performance below historical and social aspirations. *British Journal of Management*. doi: 10.1111/1467-8551.12532.

Greve, H.R. (1998). Performance, aspirations, and risky organizational change. *Administrative Science Quarterly* 43(1)**,** 58-86.

Greve, H.R. (2003a). A behavioral theory of R&D expenditures and innovations: Evidence from shipbuilding. *Academy of Management Journal* 46(6)**,** 685-702.

Greve, H.R. (2003b). Investment and the behavioral theory of the firm: Evidence from shipbuilding. *Industrial and Corporate Change* 12(5)**,** 1051-1076.

Greve, H.R. (2007). Exploration and exploitation in product innovation. *Industrial and Corporate Change* 16(5)**,** 945-975. doi: 10.1093/icc/dtm013.

Greve, H.R. (2008). A behavioral theory of firm growth: Sequential attention to size and performance goals. *Academy of Management Journal* 51(3)**,** 476-494.

Greve, H.R. (2010). Positional rigidity: low performance and resource acquisition in large and small firms. *Strategic Management Journal* 32(1)**,** 103-114. doi: 10.1002/smj.875.

Grohsjean, T., Kretschmer, T., and Stieglitz, N. (2011). Performance feedback, firm resources, and strategic change. *DRUID Working Paper* 11-02.

Grond, A. A. (2023). Organizations’ Response to CSR Performance Feedback: The Role of Financial Performance Feedback and CEO-Board Interlocks. *Tilburg University Working Paper.*

Gubbi, S.R., Aulakh, P.S., and Ray, S. (2015). International search behavior of business group affiliated firms: Scope of institutional changes and intragroup heterogeneity. *Organization Science* 26(5)**,** 1485-1501. doi: 10.1287/orsc.2015.0990.

Guo, B., and Ding, P. (2017). Invention or incremental improvement? Simulation modeling and empirical testing of firm patenting behavior under performance aspiration. *Decision Support Systems* 102**,** 32-41. doi: 10.1016/j.dss.2017.07.001.

Guo, B., and Ding, P. (2019). A behavioral theory of patent application rhythm. *Management Decision* 58(4)**,** 743-758. doi: 10.1108/md-11-2018-1271.

Han, S. (2022). The effect of performance feedback on strategic alliance formation and R&D intensity. *European Management Journal*. doi: 10.1016/j.emj.2022.03.010.

Harris, J., and Bromiley, P. (2007). Incentives to cheat: The influence of executive compensation and firm performance on financial misrepresentation. *Organization Science* 18(3)**,** 350-367. doi: 10.1287/orsc.1060.0241.

He, L., Huang, L., and Yang, G. (2021). Invest in Innovation or Not? How Managerial Cognition and Attention Allocation Shape Corporate Responses to Performance Shortfalls. *Management and Organization Review* 17(4)**,** 815-850. doi: 10.1017/mor.2021.58.

Hendron, M.G., Bednar, M.K., and Henderson, A.D. (2013). How performance relative to aspiration levels affects strategic responses to technological discontinuity. *Working Paper*.

Hoang, H., and Ener, H. (2015). Unpacking experience effects in developing novel products for new markets. *Strategic Organization* 13(4)**,** 261-283. doi: 10.1177/1476127015590141.

Hu, S., Gentry, R.J., Quigley, T.J., and Boivie, S. (2021). Who's in the Driver's Seat? Exploring Firm-Level vs. CEO-Level Effects on Problemistic Search. *Journal of Management*. doi: 10.1177/01492063211063823.

Hu, S., Gu, Q., and Xia, J. (2022). Problemistic Search of the Embedded Firm: The Joint Effects of Performance Feedback and Network Positions on Venture Capital Firms’ Risk Taking. *Organization Science* 33(5)**,** 1889-1908. doi: 10.1287/orsc.2021.1513.

Hu, S., He, Z.-L., Blettner, D.P., and Bettis, R.A. (2017). Conflict inside and outside: Social comparisons and attention shifts in multidivisional firms. *Strategic Management Journal* 38(7)**,** 1435-1454. doi: 10.1002/smj.2556.

Huang, L., He, L., and Yang, G. (2021a). Performance Shortfalls and R&D Investment Change: Aspirations, Actions, and Expectations. *Sustainability* 13(6). doi: 10.3390/su13063006.

Huang, Y.-C., Chin, Y.-C., and Lee, C.-Y. (2021b). Which executive characteristics influence risk-taking behaviours: evidence from Taiwanese companies. *Asia Pacific Business Review***,** 1-27. doi: 10.1080/13602381.2021.1917159.

Hui, K.N.-C., Gong, Y., Cui, Q., and Jiang, N. (2021). Foreign investment or divestment as a near-term solution to performance shortfalls? The moderating role of vicarious learning. *Asia Pacific Journal of Management*. doi: 10.1007/s10490-021-09778-6.

Iglesias, A.E., and Bogner, W.C. (2019). Do competitors always matter in exit decisions? A behavioral perspective. *International Journal of Business* 24(2)**,** 132-150.

Iyer, D.N., and Miller, K.D. (2008). Performance feedback, slack, and the timing of acquisitions. *Academy of Management Journal* 51(4)**,** 808-822.

Jiang, G.F., and Holburn, G.L.F. (2018). Organizational performance feedback effects and international expansion. *Journal of Business Research* 90**,** 48-58. doi: 10.1016/j.jbusres.2018.04.034.

Jirásek, M. (2023). "Innovative behavior of US pharmaceutical firms", in: *Proceedings of the 4th International Conference on Innovation and Entrepreneurship*).

Jung, J.C., and Bansal, P. (2009). How firm performance affects internationalization. *Management International Review* 49(6)**,** 709-732. doi: 10.1007/s11575-009-0014-7.

Jung, H., Lee, Y. G., & Park, S. H. (2022). Just Diverse Among Themselves: How Does Negative Performance Feedback Affect Boards’ Expertise vs. Ascriptive Diversity?. Organization Science.

Kacperczyk, A., Beckman, C.M., and Moliterno, T.P. (2015). Disentangling risk and change: Internal and external social comparison in the mutual fund industry. *Administrative Science Quarterly* 60(2)**,** 228-262. doi: 10.1177/0001839214566297.

Kavadis, N., and Castañer, X. (2015). Who drives corporate restructuring? Co-Existing owners in French firms. *Corporate Governance: An International Review* 23(5)**,** 417-433. doi: 10.1111/corg.12108.

Kavusan, K., and Frankort, H.T.W. (2019). A behavioral theory of alliance portfolio reconfiguration: Evidence from pharmaceutical biotechnology. *Strategic Management Journal* 40(10)**,** 1668-1702. doi: 10.1002/smj.3041.

Ketchen Jr, D.J., and Palmer, T.B. (1999). Strategic responses to poor organizational performance. *Journal of Management* 25(5)**,** 683-706.

Kim, E., and Rhee, M. (2017a). How airlines learn from airline accidents: An empirical study of how attributed errors and performance feedback affect learning from failure. *Journal of Air Transport Management* 58**,** 135-143. doi: 10.1016/j.jairtraman.2016.10.007.

Kim, J.-Y., Finkelstein, S., and Haleblian, J. (2015). All aspirations are not ceated equal: The differential effects of historical and social aspirations on acquisition behavior. *Academy of Management Journal* 58(5)**,** 1361-1388.

Kim, K.-H., and Tsai, W. (2012). Social comparison among competing firms. *Strategic Management Journal* 33(2)**,** 115-136. doi: 10.1002/smj.945.

Kim, M., and Kim, T. (2020). When Do CEOs Engage in CSR Activities? Performance Feedback, CEO Ownership, and CSR. *Sustainability* 12(19). doi: 10.3390/su12198195.

Kim, T., and Rhee, M. (2017b). Structural and behavioral antecedents of change: Status, distinctiveness, and relative performance. *Journal of Management* 43(3)**,** 716-741. doi: 10.1177/0149206314541150.

Kolev, K.D., and McNamara, G. (2020). The role of top management teams in firm responses to performance shortfalls. *Strategic Organization* (in press).

Kostopoulos, K., Syrigos, E., and Kuusela, P. (2023). Responding to Inconsistent Performance Feedback on Multiple Goals: The Contingency Role of Decision Maker's Status in Introducing Changes. *Long Range Planning* 56(1). doi: 10.1016/j.lrp.2022.102269.

Kotiloglu, S. (2023). Exploring how organizational performance feedback influences corporate social responsibility (CSR): the moderating role of LGBT inclusion. *Journal of Strategy and Management*. doi: 10.1108/jsma-09-2022-0170.

Kotiloglu, S., Lechler, T., and Chen, Y. (2018). A longitudinal analysis on the effects of strategic change on the sustainability of hyper growth. *Academy of Management Proceedings* 2018**,** 12852.

Kotlar, J., De Massis, A., Fang, H., and Frattini, F. (2014a). Strategic reference points in family firms. *Small Business Economics* 43(3)**,** 597-619. doi: 10.1007/s11187-014-9556-6.

Kotlar, J., De Massis, A., Frattini, F., Bianchi, M., and Fang, H. (2013). Technology acquisition in family and nonfamily firms: A longitudinal analysis of Spanish manufacturing firms. *Journal of Product Innovation Management* 30(6)**,** 1073-1088. doi: 10.1111/jpim.12046.

Kotlar, J., Fang, H., De Massis, A., and Frattini, F. (2014b). Profitability goals, control goals, and the R&D investment decisions of family and nonfamily firms. *Journal of Product Innovation Management* 31(6)**,** 1128-1145. doi: 10.1111/jpim.12165.

Kuusela, P., Keil, T., and Maula, M. (2017). Driven by aspirations, but in what direction? Performance shortfalls, slack resources, and resource-consuming vs. resource-freeing organizational change. *Strategic Management Journal* 38(5)**,** 1101-1120. doi: 10.1002/smj.2544.

Labianca, G., Fairbank, J.F., Andrevski, G., and Parzen, M. (2009). Striving toward the future: Aspiration-performance discrepancies and planned organizational change. *Strategic Organization* 7(4)**,** 433-466. doi: 10.1177/1476127009349842.

Lant , T.K., and Hewlin, P.F. (2002). Information cues and decision making: The effects of learning, momentum and socual comparison in competing teams. *Group & Organization Management* 27(3)**,** 374-407.

Lant, T.K., and Hurley, A.E. (1999). A contingency model of response to performance feedback: Escalation of commitment and incremental adaptation in resource investment decisions. *Group & Organization Management* 24(4)**,** 421-437.

Le, Q.-A., and Lee, C.-Y. (2021). Below-aspiration performance and risk-taking behaviour in the context of Taiwanese electronic firms: a contingency analysis. *Asia Pacific Business Review***,** 1-24. doi: 10.1080/13602381.2021.1932091.

Lee, J., Rhee, M., and Park, K.M. (2020). Looking backward through the looking glass: Reference groups and social comparison. *Journal of Management & Organization* 26(1)**,** 110-131. doi: 10.1017/jmo.2018.58.

Lehman, D.W., and Hahn, J. (2013). Momentum and organizational risk taking: Evidence from the National Football League. *Management Science* 59(4)**,** 852-868. doi: 10.1287/mnsc.1120.1574.

Lewellyn, K.B., and Bao, S.R. (2015). R&D investment in the global paper products industry: A behavioral theory of the firm and national culture perspective. *Journal of International Management* 21(1)**,** 1-17. doi: 10.1016/j.intman.2014.12.001.

Lim, E. (2015). The role of reference point in CEO restricted stock and its impact on R&D intensity in high-technology firms. *Strategic Management Journal* 36(6)**,** 872-889. doi: 10.1002/smj.2252.

Lim, E. (2017). CEO option wealth and firm risk-taking: An analysis of multiple reference points. *Long Range Planning* 50(6)**,** 809-825. doi: 10.1016/j.lrp.2016.12.013.

Lim, E. (2018). Social pay reference point, external environment, and risk taking: An integrated behavioral and social psychological view. *Journal of Business Research* 82**,** 68-78. doi: 10.1016/j.jbusres.2017.08.001.

Lim, E., and McCann, B.T. (2014). Performance feedback and firm risk taking: The moderating effects of CEO and outside director stock options. *Organization Science* 25(1)**,** 262-282. doi: 10.1287/orsc.2013.0830.

Lin, S.-H., Chen, Y.-J., Hsu, A.-C., Liu, Y.-C.A., and Wang, H.-C. (2012). Foreign direct investment behavir: Problemistic or slack search. *African Journal of Business Management* 6(28)**,** 8250-8260.

Lin, W.-T. (2014). How do managers decide on internationalization processes? The role of organizational slack and performance feedback. *Journal of World Business* 49(3)**,** 396-408. doi: 10.1016/j.jwb.2013.08.001.

Lohrke, F.T., Kreiser, P.M., and Weaver, K.M. (2006). The influence of current firm performance on future SME alliance formation intentions: A six-country study. *Journal of Business Research* 59(1)**,** 19-27. doi: 10.1016/j.jbusres.2005.02.002.

Lu, L.-H., and Fang, S.-C. (2014). Problematic search, slack search and institutional logic in corporate R&D strategy: An empirical analysis of Taiwanese electronics firms. *Journal of Management & Organization* 19(06)**,** 659-678. doi: 10.1017/jmo.2014.11.

Lu, L.-H., and Wong, P.-K. (2019). Performance feedback, financial slack and the innovation behavior of firms. *Asia Pacific Journal of Management* 36(4)**,** 1079-1109. doi: 10.1007/s10490-018-9634-4.

Lucas, G.J., Knoben, J., and Meeus, M.T. (2018). Contradictory yet coherent? Inconsistency in performance feedback and R&D investment change. *Journal of Management* 44(2)**,** 658–681.

Luger, J. (2023). Who depends on why: Toward an endogenous, purpose‐driven mechanism in organizations' reference selection. *Strategic Management Journal*. doi: 10.1002/smj.3486.

Lungeanu, R., Stern, I., and Zajac, E.J. (2016). When do firms change technology-sourcing vehicles? The role of poor innovative performance and financial slack. *Strategic Management Journal* 37(5)**,** 855-869. doi: 10.1002/smj.2371.

Lv, D.D., Chen, W., Zhu, H., and Lan, H. (2019). How does inconsistent negative performance feedback affect the R&D investments of firms? A study of publicly listed firms. *Journal of Business Research* 102**,** 151-162. doi: 10.1016/j.jbusres.2019.04.045.

Lv, D.D., Zhu, H., Chen, W., and Lan, H. (2021). Negative performance feedback and firm cooperation: How multiple upward social comparisons affect firm cooperative R&D. *Journal of Business Research* 132**,** 872-883. doi: 10.1016/j.jbusres.2020.11.018.

Lyócsa, Š., Výrost, T., and Baumöhl, E. (2018). Social aspirations in European banks: peerinfluenced risk behavior. *ZBW - Deutsche Zentralbibliothek* *für Wirtschaftswissenschaften, Leibniz-Informationszentrum Wirtschaft, Kiel und Hamburg*.

Ma, L. (2016). Performance feedback, government goal-setting and aspiration level adaptation: Evidence from Chinese provinces. *Public Administration* 94(2)**,** 452-471. doi: 10.1111/padm.12225.

Madadian, O., and Van den Broeke, M. (2022). R&D investments in response to performance feedback: moderating effects of firm risk profile and business strategy. *Applied Economics* 55(7)**,** 802-822. doi: 10.1080/00036846.2022.2094879.

Madsen, P.M. (2013). Perils and profits: A reexamination of the link between profitability and safety in U.S. aviation. *Journal of Management* 39(3)**,** 763-791. doi: 10.1177/0149206310396374.

Makarevich, A. (2018). Performance feedback as a cooperation “switch”: A behavioral perspective on the success of venture capital syndicates among competitors. *Strategic Management Journal* 39(12)**,** 3247-3272. doi: 10.1002/smj.2722.

Malen, J., and Vaaler, P.M. (2017). Organizational slack, national institutions and innovation effort around the world. *Journal of World Business* 52(6)**,** 782-797. doi: 10.1016/j.jwb.2017.07.001.

Mammen, J. (2021). How aspiration and expectation shortfalls drive strategic investments. *Problems and Perspectives in Management* 19(1)**,** 470-476. doi: 10.21511/ppm.19(1).2021.39.

Manzaneque, M., Rojo-Ramírez, A.A., Diéguez-Soto, J., and Martínez-Romero, M.J. (2020). How negative aspiration performance gaps affect innovation efficiency. *Small Business Economics* 54(1)**,** 209-233. doi: 10.1007/s11187-018-0091-8.

Massini, S., Lewin, A.Y., and Greve, H.R. (2005). Innovators and imitators: Organizational reference groups and adoption of organizational routines. *Research Policy* 34(10)**,** 1550-1569. doi: 10.1016/j.respol.2005.07.004.

Mazzelli, A., De Massis, A., Petruzzelli, A.M., Del Giudice, M., and Khan, Z. (2020). Behind ambidextrous search: The microfoundations of search in family and non-family firms. *Long Range Planning* 53(6). doi: 10.1016/j.lrp.2019.05.002.

Mezias, S.J., Chen, Y.-R., and Murphy, P.R. (2002). Aspiration-Level adaptation in an American financial services organization: A field study. *Management Science* 48(10)**,** 1285-1300. doi: 10.1287/mnsc.48.10.1285.277.

Miller, K.D. (1994). Diversification responses to environmental uncertainties. *Purdue CIBER Working Papers - 82*.

Mishina, Y., Dykes, B.J., Block, E.S., and Pollock, T.G. (2010). Why “good” firms do bad things: The effects of high aspirations, high expectations, and prominence on the incidence of corporate illegality. *Academy of Management Journal* 53(4)**,** 701-722.

Moliterno, T.P., Beck, N., Beckman, C.M., and Meyer, M. (2015). Knowing your place: Social performance feedback in good times and bad times. *Organization Science* 25(6)**,** 1684-1702. doi: 10.1287/orsc.2014.0923.

Moliterno, T.P., and Wiersema, M.F. (2007). Firm performance, rent appropriation, and the strategic resource divestment capability. *Strategic Management Journal* 28**,** 1065-1087. doi: 10.1002/smj.

Mount, M.P., and Baer, M. (2021). CEOs’ Regulatory Focus and Risk-Taking When Firms Perform Below and Above the Bar. *Journal of Management* (in press).

Murphy, P.R., Mezias , S.J., and Chen, Y.-R. (2001). "Adapting aspirations to feedback: The role of success and failure," in *Organizational Cognition: Computation and Interpretation,* eds. T.K. Lant & Z. Shapira. (Mahwah, NJ: Lawrence Erlbaum Associates).

Nagel, F. (2021). The role of time in organizational aspirations: Past-and future-oriented performance feedback. *Academy of Management Proceedings* 2021(1)**,** 13221.

Nevmerzhytskyi, S. (2021). "The silence of the slacked: The negative side effect of slack on problemistic search". Ivey Business School, Western University).

O'Brien, J.P., and David, P. (2014). Reciprocity and R&D search: Applying the behavioral theory of the firm to a communitarian context. *Strategic Management Journal* 35(4)**,** 550-565. doi: 10.1002/smj.2105.

Oehler, P.J., Stumpf-Wollersheim, J., and Welpe, I.M. (2018). Never change a winning routine? How performance feedback affects routine change. *Industrial and Corporate Change*. doi: 10.1093/icc/dty049.

Ok, C., and Ahn, H.S. (2019). How Does Entrepreneurial Orientation Influence the Sustainable Growth of SMEs? The Role of Relative Performance. *Sustainability* 11(19). doi: 10.3390/su11195178.

Park, K.M. (2007). Antecedents of convergence and divergence in strategic positioning: The effects of performance and aspiration on the direction of strategic change. *Organization Science* 18(3)**,** 386-402. doi: 10.1287/orsc.1060.0240.

Parker, O.N., Krause, R., and Covin, J.G. (2017). Ready, set, slow: How aspiration-relative product quality impacts the rate of new product introduction. *Journal of Management* 43(7)**,** 2333-2356. doi: 10.1177/0149206315569314.

Ploeg, M., Knoben, J., and Vermeulen, P. (2022). We are in it together: Communitarianism and the performance-innovation relationship✰. *Research Policy* 51(5). doi: 10.1016/j.respol.2022.104507.

Ref, O., and Shapira, Z. (2017). Entering new markets: The effect of performance feedback near aspiration and well below and above it. *Strategic Management Journal* 38(7)**,** 1416-1434. doi: 10.1002/smj.2561.

Rhee, L., Ocasio, W., and Kim, T. (2019). Performance feedback in hierarchical business groups: The cross-level effects of cognitive accessibility on R&D search behavior. *Organization Science* 30(1)**,** 51-69.

Roman, A., & Hill, A. (2022). Performance Below Historical Aspirations, Team Size and Member Contribution Dispersion. In Academy of Management Proceedings (Vol. 2022, No. 1, p. 12184). Briarcliff Manor, NY 10510: Academy of Management.

Rostami, M. (2008). "The joint effect of organizational performance and slack resources on corporate acquisitions in the oil industry", in: *Administrative Sciences Association of Canada.* (Halifax, Nova Scotia, Canada).

Rowley, T.J., Shipilov, A.V., and Greve, H.R. (2017). Board reform versus profits: The impact of ratings on the adoption of governance practices. *Strategic Management Journal* 38(4)**,** 815-833. doi: 10.1002/smj.2545.

Ruckman, K., and Blettner, D. (2020). Aspiration adaptation to multiple performance comparisons: Generic strategy as information filter. *Academy of Management Proceedings* 2020(1)**,** 17165.

Rudy, B.C., and Johnson, A.F. (2016). Performance, aspirations, and market versus nonmarket investment. *Journal of Management* 42(4)**,** 936-959. doi: 10.1177/0149206313503017.

Ruth, D., Iyer, D.N., and Sharp, B.M. (2013). Motivation and ability in the decision to acquire. *Journal of Business Research* 66(11)**,** 2287-2293. doi: 10.1016/j.jbusres.2012.02.044.

Salge, T.O. (2010). A behavioral model of innovative search: Evidence from public hospital services. *Journal of Public Administration Research and Theory* 21(1)**,** 181-210. doi: 10.1093/jopart/muq017.

Salge, T.O., Kohli, R., and Barrett, M. (2015). Investing in information systems: On the behavioral and institutional search mechanisms underpinning hospitals' IS investment decisions. *MIS Quarterly* 39(1)**,** 61-89.

Saraf, N., Blettner, D., and Dasgupta, S. (2018). How do you think you are doing? Managerial perceptions, aspirations and innovation. *Academy of Management Proceedings* 2018(1)**,** 17192.

Saraf, N., Dasgupta, S., and Blettner, D. (2021). EXPRESS: How do managerial perceptions of performance feedback affect innovation? *Strategic Organization* (in press).

Say, G., and Vasudeva, G. (2020). Learning from Digital Failures? The Effectiveness of Firms’ Divestiture and Management Turnover Responses to Data Breaches. *Strategy Science* 5(2)**,** 117-142. doi: 10.1287/stsc.2020.0106.

Schimmer, M., and Brauer, M. (2012). Firm performance and aspiration levels as determinants of a firm's strategic repositioning within strategic group structures. *Strategic Organization* 10(4)**,** 406-435. doi: 10.1177/1476127012457983.

Schumacher, C., Keck, S., and Tang, W. (2020). Biased interpretation of performance feedback: The role of CEO overconfidence. *Strategic Management Journal* 41(6)**,** 1139-1165. doi: 10.1002/smj.3138.

Schwab, A. (2007). Incremental organizational learning from multilevel information sources. *Organization Science* 18(2)**,** 233-251. doi: 10.i287/orsc.

Sengul, M., and Obloj, T. (2017). Better safe than sorry: Subsidiary performance feedback and internal governance in multiunit firms. *Journal of Management* 43(8)**,** 2526-2554. doi: 10.1177/0149206316677298.

Shi, W., Chen, G., and Li, B. (2022). Problem Solving or Responsibility Avoidance? The Role of CEO Internal Attribution Tendency in Shaping Corporate Downsizing in Response to Performance Shortfalls. *Journal of Management Studies*. doi: 10.1111/joms.12896.

Shijaku, E., Larraza-Kintana, M., and Urtasun-Alonso, A. (2018). Network centrality and organizational aspirations: A behavioral interaction in the context of international strategic alliances. *Journal of International Business Studies* 51(5)**,** 813-828. doi: 10.1057/s41267-018-0166-4.

Shimizu, K. (2007). Prospect Theory, Behavioral Theory, and the Threat-Rigidity Thesis: Combinative effects on organizational decisions to divest formerly acquired units. *Academy of Management Journal* 50(6)**,** 1495-1514.

Shipilov, A.V., Li, S.X., and Greve, H.R. (2011). The prince and the pauper: Search and brokerage in the initiation of status-heterophilous ties. *Organization Science* 22(6)**,** 1418-1434. doi: 10.1287/orsc.1100.0594.

Shou, Y., Shan, S., Chen, A., Cheng, Y., and Boer, H. (2020). Aspirations and environmental performance feedback: a behavioral perspective for green supply chain management. *International Journal of Operations & Production Management* 40(6)**,** 729-751. doi: 10.1108/ijopm-11-2019-0756.

Singh, S., and Guha, M. (2018). Experiential learning: analyzing success and failures in Indian telecom sector. *Benchmarking: An International Journal* 25(9)**,** 3702-3719. doi: 10.1108/bij-07-2017-0199.

Smulowitz, S.J., Rousseau, H.E., and Bromiley, P. (2020). The behavioral theory of the (community‐oriented) firm: The differing response of community‐oriented firms to performance relative to aspirations. *Strategic Management Journal* 41(6)**,** 1023-1053. doi: 10.1002/smj.3123.

Sobrepere i Profitós, X., Keil, T., and Kuusela, P. (2022). The Two Blades of the Scissors: Performance Feedback and Intrinsic Attributes in Organizational Risk Taking. *Administrative Science Quarterly* 67(4)**,** 1012-1048. doi: 10.1177/00018392221117996.

Souder, D., and Bromiley, P. (2012). Explaining temporal orientation: Evidence from the durability of firms' capital investments. *Strategic Management Journal* 33(5)**,** 550-569. doi: 10.1002/smj.970.

Su, Y., and Si, S. (2015). What motivates financial innovation across countries? The influences of performance aspiration and economic freedom. *Management International Review* 55(4)**,** 563-587. doi: 10.1007/s11575-014-0237-0.

Su, Y., and Su, T. (2017). Performance aspiration, industrial search and R&D investment among chinese firms. *Chinese Management Studies* 11(2)**,** 270-283. doi: 10.1108/cms-02-2017-0032.

Sun, Y., and Qiu, Z. (2022). Positive Performance Feedback and Innovation Search: New Ideas for Sustainable Business Development. *Sustainability* 14(4). doi: 10.3390/su14042086.

Tarakci, M., Ateş, N.Y., Floyd, S.W., Ahn, Y., and Wooldridge, B. (2018). Performance feedback and middle managers’ divergent strategic behavior: The roles of social comparisons and organizational identification. *Strategic Management Journal* 39(4)**,** 1139-1162. doi: 10.1002/smj.2745.

Titus, V., Parker, O., and Covin, J. (2019). Organizational Aspirations and External Venturing: The Contingency of Entrepreneurial Orientation. *Entrepreneurship Theory and Practice* 44(4)**,** 645-670. doi: 10.1177/1042258719838473.

Tuggle, C.S., Sirmon, D.G., Reutzel, C.R., and Bierman, L. (2010). Commanding board of director attention: Investigating how organizational performance and CEO duality affect board members' attention to monitoring. *Strategic Management Journal* 31(9)**,** 946-968. doi: 10.1002/smj.847.

Tyler, B.B., and Caner, T. (2016). New product introductions below aspirations, slack and R&D alliances: A behavioral perspective. *Strategic Management Journal* 37(5)**,** 896-910. doi: 10.1002/smj.2367.

Vidal, E., and Mitchell, W. (2015). Adding by subtracting: The relationship between performance feedback and resource reconfiguration through divestitures. *Organization Science* 26(4)**,** 1101-1118. doi: 10.1287/orsc.2015.0981.

Villagrasa, J., Buyl, T., and Escribá-Esteve, A. (2018). CEO satisfaction and intended strategic changes: The moderating role of performance cues. *Long Range Planning* 51(6)**,** 894-910. doi: 10.1016/j.lrp.2017.12.002.

Wan, L., Li, R., and Chen, Y. (2021). Negative performance feedback and corporate venture capital: The moderating effect of CEO overconfidence. *Applied Economics* 54(16)**,** 1829-1843. doi: 10.1080/00036846.2021.1982133.

Wang, K., and Zhang, X. (2021). The effect of media coverage on disciplining firms’ pollution behaviors: Evidence from Chinese heavy polluting listed companies. *Journal of Cleaner Production* 280. doi: 10.1016/j.jclepro.2020.123035.

Wangrow, D.B., Kolev, K., and Hughes-Morgan, M. (2019). Not all responses are the same: How CEO cognitions impact strategy when performance falls below aspirations. *Journal of General Management* 44(2)**,** 73-86.

Wennberg, K., Delmar, F., and McKelvie, A. (2016). Variable risk preferences in new firm growth and survival. *Journal of Business Venturing* 31(4)**,** 408-427.

Wennberg, K., and Holmquist, C. (2008). Problemistic search and international entrepreneurship. *European Management Journal* 26(6)**,** 441-454. doi: 10.1016/j.emj.2008.09.007.

Xie, E., Huang, Y., Stevens, C.E., and Lebedev, S. (2019). Performance feedback and outward foreign direct investment by emerging economy firms. *Journal of World Business* 54(6). doi: 10.1016/j.jwb.2019.101014.

Xu, Y., and Zeng, G. (2020). Corporate social performance aspiration and its effects. *Asia Pacific Journal of Management*. doi: 10.1007/s10490-020-09706-0.

Xue, S., Zhang, L., Chen, H., and Yin, J. (2022). Does environmental underperformance duration affect firms' green innovation? Evidence from China. *Business Ethics, the Environment & Responsibility* 31(3)**,** 662-681. doi: 10.1111/beer.12434.

Yang, Z., Zhang, H., and Xie, E. (2017). Performance feedback and supplier selection: A perspective from the behavioral theory of the firm. *Industrial Marketing Management* 63**,** 105-115. doi: 10.1016/j.indmarman.2016.12.003.

Ye, Y., Yu, W., and Nason, R.S. (2021). Performance feedback persistence: comparative effects of historical versus peer performance feedback on innovative search. *Journal of Management* 47(4)**,** 1053-1081. doi: 10.4119727/01643920063921096126225.

Yu, W., Minniti, M., and Nason, R. (2018). Underperformance duration and innovative search: Evidence from the high‐tech manufacturing industry. *Strategic Management Journal* 40(5)**,** 836-861. doi: 10.1002/smj.2988.

Zhang, C.M., and Greve, H.R. (2018). Delayed adoption of rules: A relational theory of firm exposure and state cooptation. *Journal of Management* 44(8)**,** 3336-3363. doi: 10.4119727/016439210636176637737119.

Zhang, L. (2018). Risk or uncertainty: The effect of performance on risk taking in the mutual fund industry. *Working Paper*.

Zhong, X., Ren, L., and Song, T. (2021). Beyond Market Strategies: How Multiple Decision-Maker Groups Jointly Influence Underperforming Firms’ Corporate Social (Ir)responsibility. *Journal of Business Ethics*. doi: 10.1007/s10551-021-04796-2.

Zhong, X., Ren, L., and Song, T. (2022). To cheat when continuously missing aspirations: Does CEO experience matter? *Asia Pacific Journal of Management*. doi: 10.1007/s10490-022-09805-0.

**
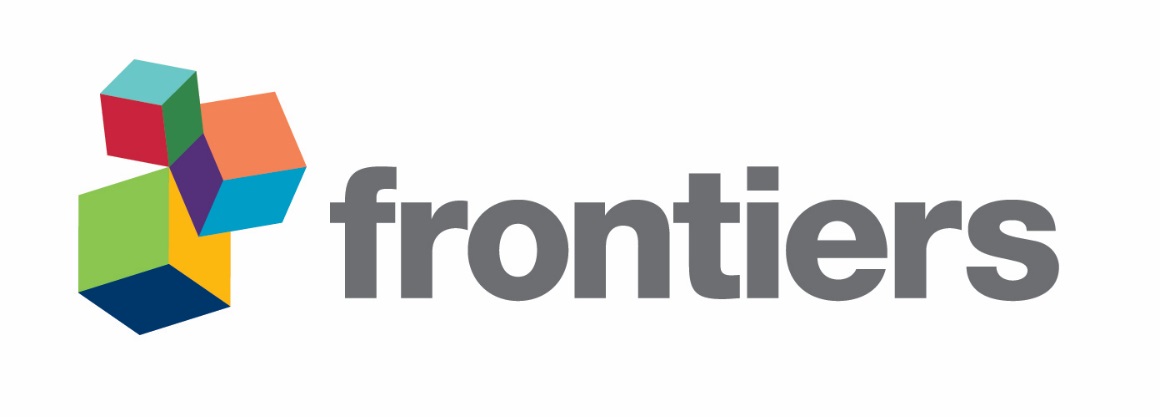
**
